# Supplementary material
Source: publisher figshare collection journal article supplement (https://gsajournals.figshare.com/articles/dataset/_/7448234)
Supplement: Supplementary file 1 [file 1]

Supporting information

*beditor*: A computational workflow for  
designing libraries of guide RNAs for  
CRISPR-mediated base editing

Supporting figures ..... 2

Supporting tables ..... 8

References..... 18

## Supporting figures

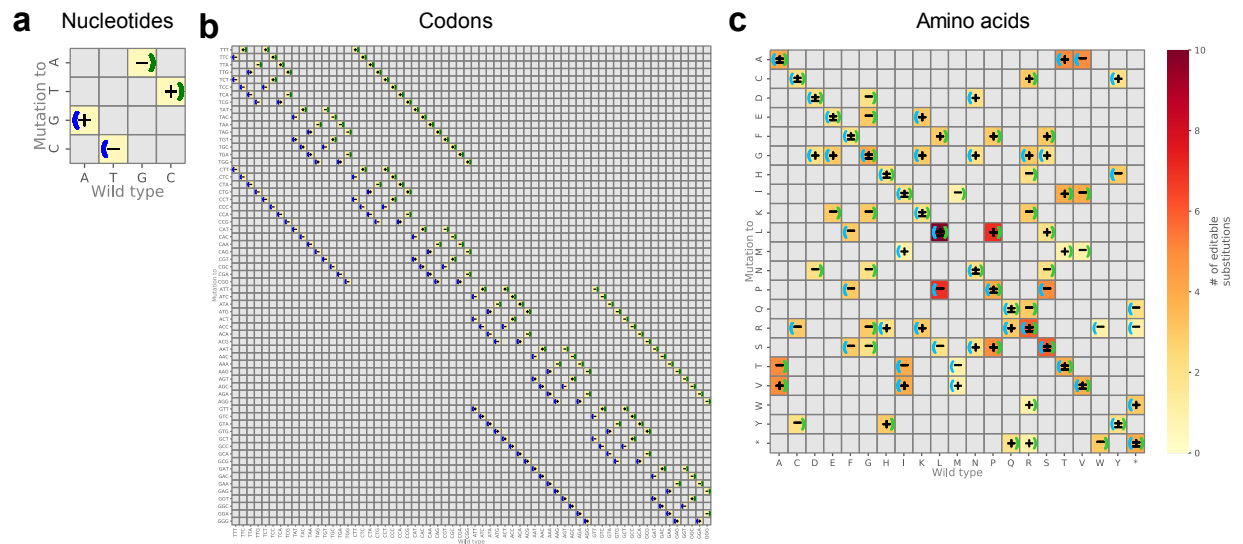

**Flg S1 : Possible substitutions by current ABE and CBE.**

**a** Nucleotide level substitutions.

**b** Codon level substitutions.

**b** Amino acid level substitutions.

Shown on the heatmaps are the cumulative number of substitutions that can be edited with either ABE or CBE. Left and right brackets indicate that the substitution is carried out by ABE and CBE respectively. +, - and  $\pm$  indicate substitutions for which guide RNA is designed on the +, - and both the strands respectively. Shown in gray are substitutions that are absent in the input data. The symbol \* represents a non-sense mutation.

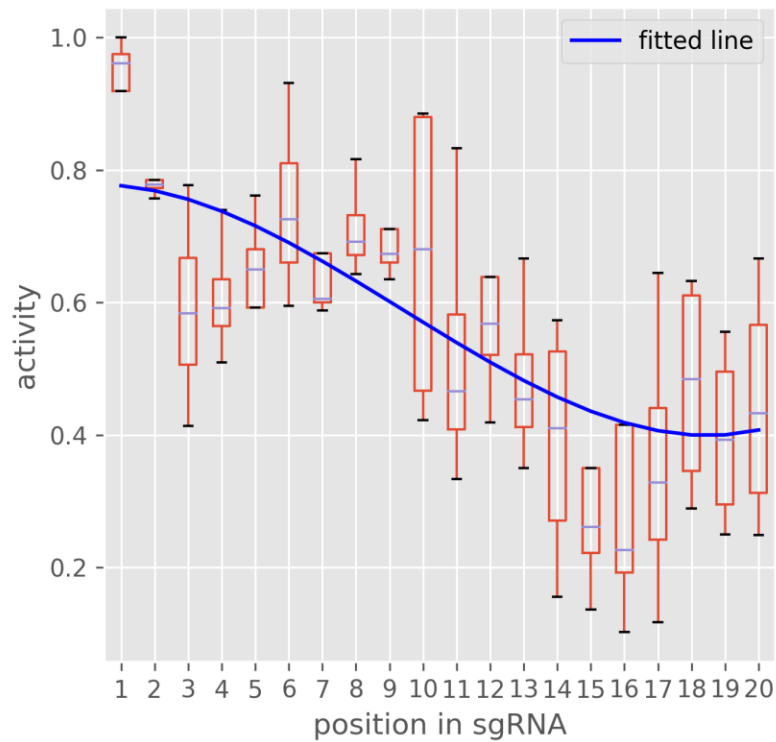

**Fig S2: Fitting a third degree polynomial equation to the mismatch tolerance data from Doench et. al (3).**

The gRNA activity values at each mismatch position are shown as boxplots (red). The third degree polynomial equation fitted line is shown in blue.

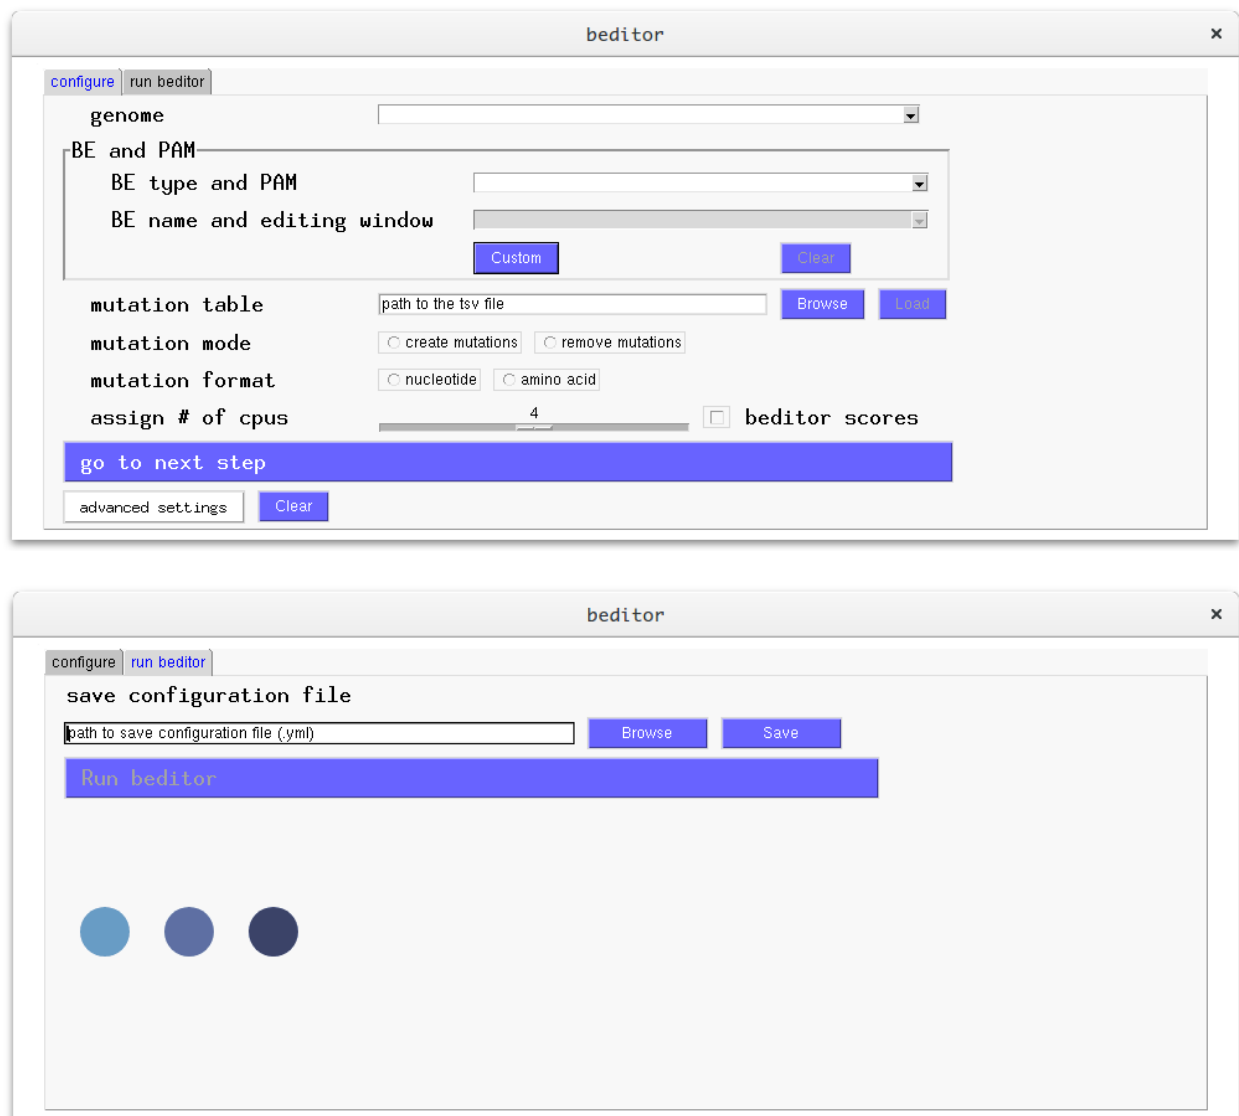

**Fig S3: Graphical User Interface (GUI) of *beditor*.**

Top: In the first tab of the GUI, the parameters for the analysis workflow can be provided using a series of options. These basic parameters include the species name, the name of the base editor and the PAM sequence, an input list of mutations, the format of mutations (amino acids and nucleotide) and mode of mutagenesis (model or correct), the number of cores (processors) and If the *beditor* scores are to be calculated for the gRNAs.

Bottom: the second tab of the GUI provides option to save the parameters of the analysis workflow as a YAML file and then subsequently run the program.

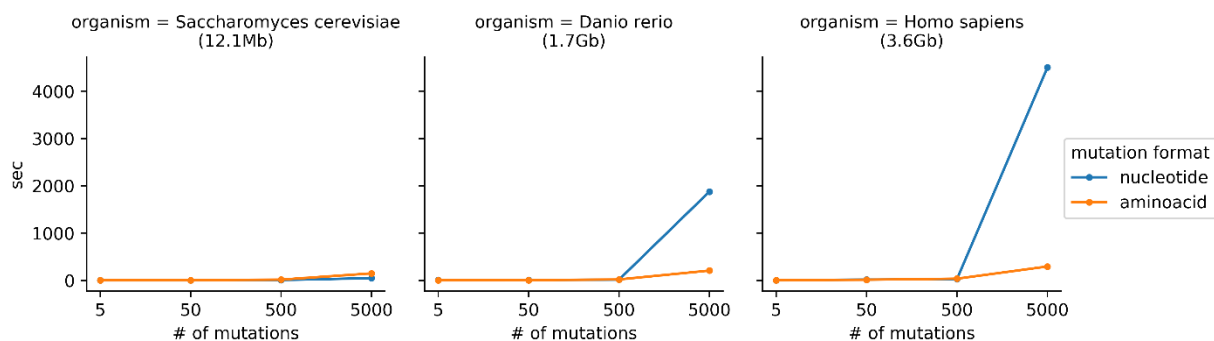

**Fig S4: The time taken to design gRNA libraries depends on the number of mutations and the size of the genome.**

Sets of 5-5000 nucleotide and amino acid mutations were tested with genomes of 3 species. 6 parallel processors (cores) were used for the analysis. The analysis was carried out using test\_beditor.py script from test\_beditor repository ([https://github.com/rraadd88/test\\_beditor](https://github.com/rraadd88/test_beditor)). Note that the time does not include the time taken for installation of the genomes (i.e. downloading and indexing of the genomes).

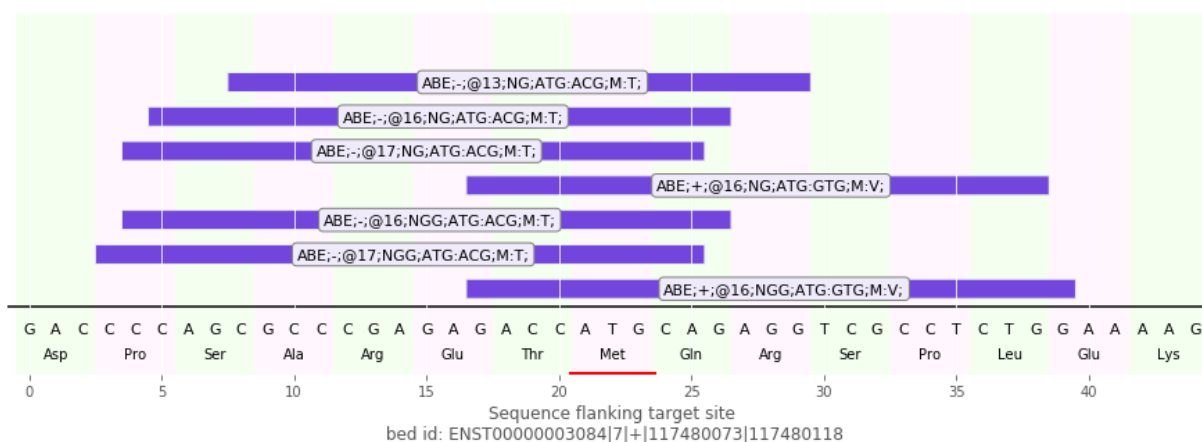

**Fig S5: Representative visualizations of alignment between a gRNA and target genomic sequence.**

The gRNA are shown in purple and with annotations denoting its identity (name of the base editor, target strand, distance from PAM sequence, PAM, reference codon, mutated codon, wild-type amino acid and mutated amino acid) is shown on the guide RNA. The target site is indicated in red color. Reading frames and genomic coordinates of the target DNA are shown below.

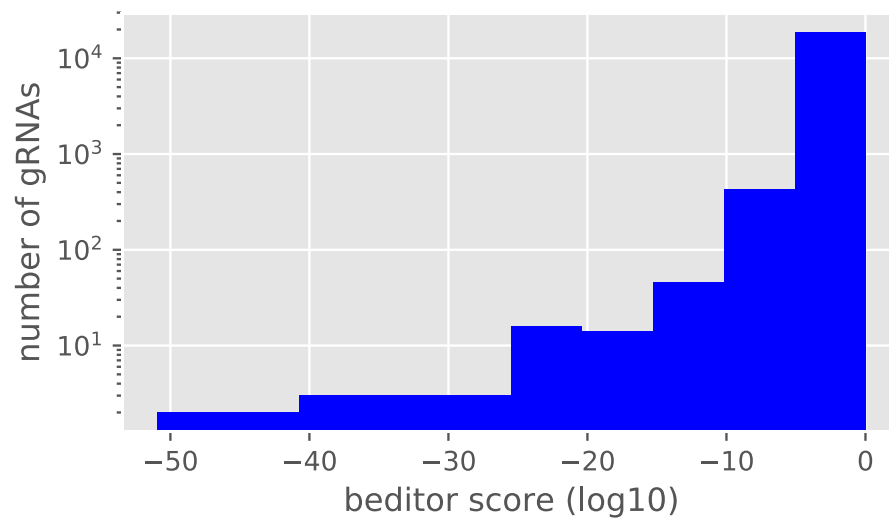

**Fig S6: Distribution of beditor scores for the gRNA library designed for the demonstrative analysis of clinically associated human nucleotide mutations in 'model' mode.**

## Supporting tables

**Table S1: Comparison of features of *beditor* with other existing tools.**

| Feature                                                                                 | <i>beditor</i>      | iSTOP[1] | BE-analyzer[2]          | Benchling [3]           |
|-----------------------------------------------------------------------------------------|---------------------|----------|-------------------------|-------------------------|
| Number of species whose genomes are directly compatible                                 | >125                | ~70      | ~40                     | >100                    |
| Searches sites editable by base editors                                                 | Yes                 | Yes      | Yes                     | Yes only BE [4]         |
| Designs gRNAs against predefined set of nucleotide mutations                            | Yes                 | No       | No                      | No                      |
| Designs gRNAs against predefined set of amino acid mutations                            | Yes                 | No       | No                      | No                      |
| Designs gRNAs for mutational scanning using a predefined amino acid substitution matrix | Yes                 | No       | No                      | No                      |
| Designs gRNAs against non-sense mutations                                               | Yes                 | Yes      | No                      | Yes                     |
| Designs control gRNAs                                                                   | Yes                 | No       | No                      | No                      |
| Generation of gRNA libraries for genome-wide screening of mutations                     | Yes                 | No       | 1 target site at a time | 1 target site at a time |
| Multithreading/ parallel computing                                                      | Yes                 | No       | No                      | No                      |
| Allows addition of any novel/custom PAM recognition sequence                            | Yes                 | No       | No                      | No                      |
| Allows addition of any novel/custom base editors                                        | Yes                 | No       | No                      | No                      |
| Estimation of editing efficiency of gRNAs                                               | Yes                 | No       | No                      | Yes                     |
| Integrates independent measures of off-target effects                                   | Yes (CFD scores[5]) | No       | No                      | Yes                     |



Table S2: Penalties used for the calculation of the *beditor* score.

| Penalty   | Value |
|-----------|-------|
| $P_{min}$ | 0.9   |
| $P_{max}$ | 0.1   |
| $G_g$     | 0.5   |
| $G_{ig}$  | 0.9   |
| $A$       | 0.5   |

**Table S3: Default PAM recognition sequences supported by beditor.**

| PAM             | Description                                          | position | length of guide sequence | Reference |
|-----------------|------------------------------------------------------|----------|--------------------------|-----------|
| <b>NG</b>       | xCas9                                                | 3'       | 20                       | [6]       |
| <b>NGA</b>      | SpCas9 mutant                                        | 3'       | 20                       | [7]       |
| <b>NGCG</b>     | SpCas9 mutant                                        | 3'       | 20                       | [7]       |
| <b>NGG</b>      | SpCas9                                               | 3'       | 20                       | [8,9]     |
| <b>NGGNG</b>    | Cas9 <i>S. Thermophilus</i>                          | 3'       | 20                       | [10,11]   |
| <b>NGK</b>      | xCas9                                                | 3'       | 20                       | [6]       |
| <b>NGN</b>      | xCas9                                                | 3'       | 20                       | [6]       |
| <b>NNAGAA</b>   | Cas9 <i>S. Thermophilus</i>                          | 3'       | 20                       | [10,11]   |
| <b>NNGRRT</b>   | SaCas9                                               | 3'       | 21                       | [12]      |
| <b>NNNNACA</b>  | CjCas9                                               | 3'       | 20                       | [13]      |
| <b>NNNNGMTT</b> | Cas9 <i>N. Meningitidis</i>                          | 3'       | 20                       | [14]      |
| <b>NNNRRT</b>   | KKH SaCas9                                           | 3'       | 21                       | [7,12]    |
| <b>TATV</b>     | AsCpf1 mutant                                        | 5'       | 23                       | [15]      |
| <b>TTN</b>      | Cpf1 <i>F. Novicida</i>                              | 5'       | 23                       | [16]      |
| <b>TTTN</b>     | Cpf1 <i>Acidaminococcus</i> / <i>Lachnospiraceae</i> | 5'       | 23                       | [16]      |
| <b>TYCV</b>     | TYCV AsCpf1 mutant                                   | 5'       | 23                       | [15]      |

**Table S4: Input parameters used for the demonstrative analysis of clinically associated human genetic variants**

| Variable                      | Input                   | Description                                                                           |
|-------------------------------|-------------------------|---------------------------------------------------------------------------------------|
| <b>Host</b>                   |                         | Name of host organism                                                                 |
| <b>genomerelease</b>          | 93                      | Ensembl genome release                                                                |
| <b>genomeassembly</b>         |                         | Genome assembly version                                                               |
| <b>dinp</b>                   | din.tsv                 | File path of input tab-separated file                                                 |
| <b>mutation_format</b>        | [aminoacid, nucleotide] | Whether the input data consists of amino acid or nucleotide mutations.                |
| <b>reverse_mutations</b>      | [FALSE, TRUE]           | FALSE if design guide RNAs to 'model' mutations, TRUE to 'correct' mutations.         |
| <b>Mutations</b>              | mutations               | Information about mutated amino acid is taken from the input file                     |
| <b>mutation_type</b>          | N                       | Type of mutations to process, N: non-synonymous, S: synonymous, else: both            |
| <b>keep_mutation_nonsense</b> | FALSE                   | Whether to process non-sense mutations                                                |
| <b>pams</b>                   | [NGG, NG]               | List of PAMs to use                                                                   |
| <b>bes</b>                    | [Target-AID, ABE]       | List of Base Editors to use                                                           |
| <b>max_subs_per_codon</b>     | 1                       | Maximum number of nucleotides that can be edited in the target codon.                 |
| <b>mismatches_max</b>         | 2                       | Maximum number of mismatches allowed in the alignment gRNAs against reference genome. |
| <b>Cores</b>                  | 5                       | Number of processors to use for parallel processing                                   |
| <b>Chunksize</b>              | 200                     | Number of mutations to process per processor                                          |

**Table S5: Summary statistics of demonstrative analysis with custom base editors and PAM recognition sequences.**

|                                                    | nucleotide | amino acid | nucleotide | amino acid |
|----------------------------------------------------|------------|------------|------------|------------|
| <b>Correct/model mutation</b>                      | correct    | correct    | model      | model      |
| <b>Total number of mutations in the input data</b> | 1000       | 1000       | 1000       | 1000       |
| <b>Total number of mutations edited</b>            | 263        | 117        | 246        | 105        |
| <b>Total number of guides designed</b>             | 817        | 562        | 791        | 403        |
| <b>% editability</b>                               | 26.3       | 11.7       | 24.6       | 10.5       |
| <b>number of guides per mutation</b>               | 3.10646    | 4.80342    | 3.21545    | 3.8381     |

**Table S6: Summary statistics of demonstrative analysis of representative set of species.**

| Species                                | metrics                                     | nucleotide | amino acid | nucleotide | amino acid |
|----------------------------------------|---------------------------------------------|------------|------------|------------|------------|
|                                        | Correct/model mutation                      | correct    | correct    | model      | model      |
|                                        | Total number of mutations in the input data | 1000.00    | 1000.00    | 1000.00    | 1000.00    |
| <b><i>Bos taurus</i></b>               | Total number of mutations edited            | 76.00      | 45.00      | 69.00      | 36.00      |
|                                        | Total number of guides designed             | 123.00     | 83.00      | 121.00     | 62.00      |
|                                        | % editability                               | 7.60       | 4.50       | 6.90       | 3.60       |
|                                        | number of guides per mutation               | 1.62       | 1.84       | 1.75       | 1.72       |
| <b><i>Danio rerio</i></b>              | Total number of mutations edited            | 45.00      | 39.00      | 57.00      | 43.00      |
|                                        | Total number of guides designed             | 71.00      | 59.00      | 74.00      | 72.00      |
|                                        | % editability                               | 4.50       | 3.90       | 5.70       | 4.30       |
|                                        | number of guides per mutation               | 1.58       | 1.51       | 1.30       | 1.67       |
| <b><i>Equus caballus</i></b>           | Total number of mutations edited            | 80.00      | 53.00      | 55.00      | 43.00      |
|                                        | Total number of guides designed             | 136.00     | 94.00      | 92.00      | 81.00      |
|                                        | % editability                               | 8.00       | 5.30       | 5.50       | 4.30       |
|                                        | number of guides per mutation               | 1.70       | 1.77       | 1.67       | 1.88       |
| <b><i>Felis catus</i></b>              | Total number of mutations edited            | 94.00      | 55.00      | 81.00      | 50.00      |
|                                        | Total number of guides designed             | 168.00     | 103.00     | 160.00     | 80.00      |
|                                        | % editability                               | 9.40       | 5.50       | 8.10       | 5.00       |
|                                        | number of guides per mutation               | 1.79       | 1.87       | 1.98       | 1.60       |
| <b><i>Gallus gallus</i></b>            | Total number of mutations edited            | 93.00      | 39.00      | 74.00      | 46.00      |
|                                        | Total number of guides designed             | 180.00     | 71.00      | 139.00     | 77.00      |
|                                        | % editability                               | 9.30       | 3.90       | 7.40       | 4.60       |
|                                        | number of guides per mutation               | 1.94       | 1.82       | 1.88       | 1.67       |
| <b><i>Macaca fascicularis</i></b>      | Total number of mutations edited            | 45.00      | 51.00      | 52.00      | 48.00      |
|                                        | Total number of guides designed             | 89.00      | 83.00      | 90.00      | 75.00      |
|                                        | % editability                               | 4.50       | 5.10       | 5.20       | 4.80       |
|                                        | number of guides per mutation               | 1.98       | 1.63       | 1.73       | 1.56       |
| <b><i>Mus musculus</i></b>             | Total number of mutations edited            | 81.00      | 46.00      | 74.00      | 47.00      |
|                                        | Total number of guides designed             | 147.00     | 93.00      | 133.00     | 83.00      |
|                                        | % editability                               | 8.10       | 4.60       | 7.40       | 4.70       |
|                                        | number of guides per mutation               | 1.81       | 2.02       | 1.80       | 1.77       |
| <b><i>Pan paniscus</i></b>             | Total number of mutations edited            | 73.00      | 57.00      | 62.00      | 54.00      |
|                                        | Total number of guides designed             | 123.00     | 89.00      | 98.00      | 90.00      |
|                                        | % editability                               | 7.30       | 5.70       | 6.20       | 5.40       |
|                                        | number of guides per mutation               | 1.68       | 1.56       | 1.58       | 1.67       |
| <b><i>Saccharomyces cerevisiae</i></b> | Total number of mutations edited            | 36.00      | 30.00      | 36.00      | 35.00      |
|                                        | Total number of guides designed             | 52.00      | 45.00      | 46.00      | 52.00      |

|                          |                                  |        |        |       |       |
|--------------------------|----------------------------------|--------|--------|-------|-------|
|                          | % editability                    | 3.60   | 3.00   | 3.60  | 3.50  |
|                          | number of guides per mutation    | 1.44   | 1.50   | 1.28  | 1.49  |
| <b><i>Sus scrofa</i></b> | Total number of mutations edited | 68.00  | 50.00  | 55.00 | 45.00 |
|                          | Total number of guides designed  | 108.00 | 106.00 | 86.00 | 82.00 |
|                          | % editability                    | 6.80   | 5.00   | 5.50  | 4.50  |
|                          | number of guides per mutation    | 1.59   | 2.12   | 1.56  | 1.82  |

**Table S7: Summary statistics for case study analysis of clinically relevant human SNPs.**

| <b>Mutation format</b>                             | <b>nucleotide</b> | <b>amino acid</b> | <b>nucleotide</b> | <b>amino acid</b> |
|----------------------------------------------------|-------------------|-------------------|-------------------|-------------------|
| <b>Correct/model mutation</b>                      | correct           | correct           | model             | model             |
| <b>Total number of mutations in the input data</b> | 61083             | 81819             | 61083             | 81819             |
| <b>Total number of mutations edited</b>            | 13709             | 19996             | 13867             | 20420             |
| <b>Total number of guides designed</b>             | 23432             | 35390             | 22587             | 33311             |
| <b>% editability</b>                               | 22.44             | 24.43             | 22.70             | 24.95             |

**Table S8: Default pairs of base editors and PAM recognition sequences supported by beditor.**

| Base editor | nucleotide wt | nucleotide mutation | window start | window end | guide length | PAM    | PAM position | reference |
|-------------|---------------|---------------------|--------------|------------|--------------|--------|--------------|-----------|
| BE1         | C             | T                   | 4            | 8          | 20           | NGG    | downstream   | [17]      |
| BE2         | C             | T                   | 4            | 8          | 20           | NGG    | downstream   | [17]      |
| BE3         | C             | T                   | 4            | 8          | 20           | NGG    | downstream   | [17]      |
| HF-BE3      | C             | T                   | 4            | 8          | 20           | NGG    | downstream   | [17]      |
| BE4/BE4max  | C             | T                   | 4            | 8          | 20           | NGG    | downstream   | [18,19]   |
| BE4-Gam     | C             | T                   | 4            | 8          | 20           | NGG    | downstream   | [18]      |
| YE1-BE3     | C             | T                   | 5            | 7          | 20           | NGG    | downstream   | [20]      |
| EE-BE3      | C             | T                   | 5            | 6          | 20           | NGG    | downstream   | [20]      |
| YE2-BE3     | C             | T                   | 5            | 6          | 20           | NGG    | downstream   | [20]      |
| YEE-BE3     | C             | T                   | 5            | 6          | 20           | NGG    | downstream   | [20]      |
| VQR-BE3     | C             | T                   | 4            | 11         | 20           | NGAN   | downstream   | [20]      |
| VRER-BE3    | C             | T                   | 3            | 10         | 20           | NGCG   | downstream   | [20]      |
| SaBE3       | C             | T                   | 3            | 12         | 21           | NNGRRT | downstream   | [20]      |
| SaBE4       | C             | T                   | 3            | 12         | 21           | NNGRRT | downstream   | [18]      |
| SaBE4-Gam   | C             | T                   | 3            | 12         | 21           | NNGRRT | downstream   | [18]      |
| SA(KKH)-BE3 | C             | T                   | 3            | 12         | 21           | NNNRRT | downstream   | [20]      |
| Cas12a-BE   | C             | T                   | 10           | 12         | 23           | TTTV   | upstream     | [21]      |
| Target-AID  | C             | T                   | 2            | 4          | 20           | NGG    | downstream   | [22]      |
| Target-AID  | C             | T                   | 2            | 4          | 20           | NG     | downstream   | [23]      |
| xBE3        | C             | T                   | 4            | 8          | 20           | NG     | downstream   | [6]       |
| eA3A-BE3    | C             | T                   | 4            | 8          | 20           | NGG    | downstream   | [24]      |
| A3A-BE3     | C             | T                   | 4            | 8          | 20           | NGG    | downstream   | [25]      |
| BE-PLUS     | C             | T                   | 4            | 14         | 20           | NGG    | downstream   | [26]      |
| ABE7.9      | A             | G                   | 5            | 8          | 20           | NGG    | downstream   | [17]      |
| ABE7.10     | A             | G                   | 4            | 7          | 20           | NGG    | downstream   | [17]      |
| ABE7.10*    | A             | G                   | 4            | 8          | 20           | NGG    | downstream   | [17]      |
| xABE7.10    | A             | G                   | 4            | 7          | 20           | NG     | downstream   | [6]       |
| ABESa       | A             | G                   | 6            | 12         | 21           | NNGRRT | downstream   | [6,27]    |
| VQR-ABE     | A             | G                   | 4            | 6          | 20           | NGA    | downstream   | [6,27]    |
| VRER-ABE    | A             | G                   | 4            | 6          | 20           | NGCG   | downstream   | [6,27]    |



|                    |   |   |   |    |    |        |            |        |
|--------------------|---|---|---|----|----|--------|------------|--------|
| <b>Sa(KKH)-ABE</b> | A | G | 6 | 12 | 21 | NNNRRT | downstream | [6,27] |
|--------------------|---|---|---|----|----|--------|------------|--------|

## References

1. Billon P, Bryant EE, Joseph SA, Nambiar TS, Hayward SB, Rothstein R, et al. CRISPR-Mediated Base Editing Enables Efficient Disruption of Eukaryotic Genes through Induction of STOP Codons. *Mol Cell* [Internet]. Elsevier Inc.; 2017;67:1068–1079.e4. Available from: <http://dx.doi.org/10.1016/j.molcel.2017.08.008>
2. Hwang G, Park J, Lim K, Kim S, Yu J, Eils R, et al. Web-based design and analysis tools for CRISPR base editing. *bioRxiv* [Internet]. 2018;5:373944. Available from: [https://www.biorxiv.org/content/early/2018/07/22/373944?rss=1&utm\\_source=dlvr.it&utm\\_medium=twitter](https://www.biorxiv.org/content/early/2018/07/22/373944?rss=1&utm_source=dlvr.it&utm_medium=twitter)
3. Benchling Inc. Benchling for Academics · Benchling. Benchling. 2018.
4. Komor AC, Kim YB, Packer MS, Zuris JA, Liu DR. Programmable editing of a target base in genomic DNA without double-stranded DNA cleavage. *Nature*. Nature Publishing Group; 2016;533:420.
5. Doench JG, Fusi N, Sullender M, Hegde M, Vaimberg EW, Donovan KF, et al. Optimized sgRNA design to maximize activity and minimize off-target effects of CRISPR-Cas9. *Nat Biotechnol* [Internet]. Nature Publishing Group; 2016;34:184–91. Available from: <http://dx.doi.org/10.1038/nbt.3437>
6. Hu JH, Miller SM, Geurts MH, Tang W, Chen L, Sun N, et al. Evolved Cas9 variants with broad PAM compatibility and high DNA specificity. *Nature* [Internet]. Nature Publishing Group; 2018;556:57–63. Available from: <http://dx.doi.org/10.1038/nature26155>
7. Kleinstiver BP, Prew MS, Tsai SQ, Topkar V V., Nguyen NT, Zheng Z, et al. Engineered CRISPR-Cas9 nucleases with altered PAM specificities. *Nature*. 2015;
8. Hsu PD, Scott DA, Weinstein JA, Ran FA, Konermann S, Agarwala V, et al. DNA targeting specificity of RNA-guided Cas9 nucleases. *Nat Biotechnol*. 2013;31:827–32.
9. Jinek M, Chylinski K, Fonfara I, Hauer M, Doudna JA, Charpentier E. A programmable dual-RNA-guided DNA endonuclease in adaptive bacterial immunity. *Science* (80- ). 2012;
10. Magadán AH, Dupuis MÈ, Villion M, Moineau S. Cleavage of phage DNA by the *Streptococcus thermophilus* CRISPR3-Cas system. *PLoS One*. 2012;
11. Garneau JE, Dupuis MÈ, Villion M, Romero DA, Barrangou R, Boyaval P, et al. The CRISPR/cas bacterial immune system cleaves bacteriophage and plasmid DNA. *Nature*. 2010;
12. Kleinstiver BP, Prew MS, Tsai SQ, Nguyen NT, Topkar V V., Zheng Z, et al. Broadening the targeting range of *Staphylococcus aureus* CRISPR-Cas9 by modifying PAM recognition. *Nat Biotechnol*. 2015;
13. Gasiunas G, Barrangou R, Horvath P, Siksnys V. Cas9-crRNA ribonucleoprotein

complex mediates specific DNA cleavage for adaptive immunity in bacteria. *Proc Natl Acad Sci U S A*. 2012;

14. Hou Z, Zhang Y, Propson NE, Howden SE, Chu L, Sontheimer EJ, et al. Efficient genome engineering in human pluripotent stem cells using Cas9 from *Neisseria meningitidis*. *Proc Natl Acad Sci USA*. 2013;

15. Gao L, Cox DBT, Yan WX, Manteiga JC, Schneider MW, Yamano T, et al. Engineered Cpf1 variants with altered PAM specificities. *Nat Biotechnol* [Internet]. Nature Publishing Group; 2017;35:789–92. Available from: <http://dx.doi.org/10.1038/nbt.3900>

16. Zetsche B, Gootenberg JS, Abudayyeh OO, Slaymaker IM, Makarova KS, Essletzbichler P, et al. Cpf1 Is a Single RNA-Guided Endonuclease of a Class 2 CRISPR-Cas System. *Cell*. 2015;

17. Gaudelli NM, Komor AC, Rees HA, Packer MS, Badran AH, Bryson DI, et al. Programmable base editing of A•T to G•C in genomic DNA without DNA cleavage. *Nature* [Internet]. Nature Publishing Group; 2017;551:464–71. Available from: <http://www.nature.com/doi/10.1038/nature24644>

18. Komor AC, Zhao KT, Packer MS, Gaudelli NM, Waterbury AL, Koblan LW, et al. Improved base excision repair inhibition and bacteriophage Mu Gam protein yields C:G-to-T:A base editors with higher efficiency and product purity. *Sci Adv*. 2017;

19. Koblan LW, Doman JL, Wilson C, Levy JM, Tay T, Newby GA, et al. Improving cytidine and adenine base editors by expression optimization and ancestral reconstruction. *Nat Biotechnol*. 2018;

20. Kim YB, Komor AC, Levy JM, Packer MS, Zhao KT, Liu DR. Increasing the genome-targeting scope and precision of base editing with engineered Cas9-cytidine deaminase fusions. *Nat Biotechnol* [Internet]. Nature Publishing Group; 2017;35:371–6. Available from: <http://dx.doi.org/10.1038/nbt.3803>

21. Li X, Wang Y, Liu Y, Yang B, Wang X, Wei J, et al. Base editing with a Cpf1 – cytidine deaminase fusion. 2018;36.

22. Nishida K, Arazoe T, Yachie N, Banno S, Kakimoto M, Tabata M, et al. Targeted nucleotide editing using hybrid prokaryotic and vertebrate adaptive immune systems. 2016;8729:1–14.

23. Nishimasu H, Shi X, Ishiguro S, Gao L, Hirano S, Okazaki S, et al. Engineered CRISPR-Cas9 nuclease with expanded targeting space. *Science* (80- ) [Internet]. 2018;9129:eaas9129. Available from: <http://www.sciencemag.org/lookup/doi/10.1126/science.aas9129>

24. Gehrke JM, Cervantes O, Clement MK, Wu Y, Zeng J, Bauer DE, et al. An APOBEC3A-Cas9 base editor with minimized bystander and off-target activities. *Nat Biotechnol* [Internet]. Nature Publishing Group; 2018; Available from: <http://dx.doi.org/10.1038/nbt.4199>

25. Gehrke JM, Cervantes OR, Clement MK, Pinello L, Joung JK, Unit MP, et al. High-precision CRISPR-Cas9 base editors with minimized bystander and off-target mutations. bioRxiv [Internet]. 2018;273938. Available from: <https://www.biorxiv.org/content/early/2018/03/01/273938>
26. Jiang W, Feng S, Huang S, Yu W, Li G, Yang G, et al. BE-PLUS: a new base editing tool with broadened editing window and enhanced fidelity. Cell Res. 2018;
27. Hua K, Tao X, Zhu JK. Expanding the base editing scope in rice by using Cas9 variants. Plant Biotechnol J. 2019;
